# Supplementary material for: From data to insights: a tool for comprehensive Quantification of Continuous Glucose Monitoring (QoCGM)
Source: PeerJ. 2025 Jun 9;13:e19501. doi: 10.7717/peerj.19501 (PMC12161138; doi:10.7717/peerj.19501)
Supplement: Supplemental Information 2 [file peerj-13-19501-s002.xlsx]

## Sheet: Sheet1
metric	medianValue	q25	q75
completenessRate	100	99.41	100
sample_n	1876	1867.5	1882
Mean	168.85	151.915	198.225
Median	162.09	145.005	193.05
Std	43.115	34.01	54.14
CV	24.545	21.21	29.09
IQR	57.635	45.06	72.055
Pctile75	192.85	173.535	230.5
Pctile25	135.02	122.29	160.89
TIR	65.12	39.135	77.72
TITR	28.2	12.01	44.41
TBR1	0	0	0.11
TBR2	0	0	0
TBR	0	0	0.21
TAR1	25.815	17.505	37.335
TAR2	5.225	0.96	16.335
TAR	34.435	21.21	60.81
sample_n_nighttime	576	576	576
Mean_nighttime	153.93	133.47	188.58
Median_nighttime	149.715	128.99	185.405
Std_nighttime	33.17	23.265	44.14
CV_nighttime	19.84	15.49	25.97
IQR_nighttime	41.44	28.99	59.455
Pctile75_nighttime	173.01	148.02	215.265
Pctile25_nighttime	131.535	117.12	158.56
TIR_nighttime	78.99	45.835	92.97
TITR_nighttime	35.415	10.505	64.5
TBR1_nighttime	0	0	0
TBR2_nighttime	0	0	0
TBR_nighttime	0	0	0
TAR1_nighttime	16.84	4.86	36.635
TAR2_nighttime	0.87	0	9.205
TAR_nighttime	20.56	5.38	53.91
sample_n_daytime	1300	1291.5	1306
Mean_daytime	172.715	156.925	203.295
Median_daytime	167.555	150.16	200.15
Std_daytime	44.185	34.97	54.77
CV_daytime	24.455	20.5	29.155
IQR_daytime	59.27	45.995	75.87
Pctile75_daytime	200.02	181.225	241.075
Pctile25_daytime	144.02	125.105	167.53
TIR_daytime	59.16	33.615	73.135
TITR_daytime	19.955	9.21	38.045
TBR1_daytime	0	0	0
TBR2_daytime	0	0	0
TBR_daytime	0	0	0
TAR1_daytime	30.295	20.075	38.94
TAR2_daytime	6.555	1.39	20.555
TAR_daytime	40.245	25.925	66.39
