# Supplementary material for: From data to insights: a tool for comprehensive Quantification of Continuous Glucose Monitoring (QoCGM)
Source: PeerJ. 2025 Jun 9;13:e19501. doi: 10.7717/peerj.19501 (PMC12161138; doi:10.7717/peerj.19501)
Supplement: Supplemental Information 3 [file peerj-13-19501-s003.docx]

| Supplementary material S1 |
| --- |

Supplementary material S1 provide detailed explanation and mathematical definition of the CGM derived metrics.

| MAGE | Identify significant excursions above a threshold . |
| --- | --- |
| GRI |  |
| Time in range |  |
| Mobilty |  |
| CONGA |  |
| LBGI  HBGI | Transform the glucose values:  Calculate the risk function:  Determine the LBGI:  Determine the HBGI: |
| GRADE | Calculate the GRADE score for each glucose value:  Overall GRADE score:  GRADE for Hypoglycemia: |
| DTpM |  |
