# Supplementary material for: From data to insights: a tool for comprehensive Quantification of Continuous Glucose Monitoring (QoCGM)
Source: PeerJ. 2025 Jun 9;13:e19501. doi: 10.7717/peerj.19501 (PMC12161138; doi:10.7717/peerj.19501)

| Supplementary material S2 |
| --- |

Supplementary material S2 provide annotations on R2 between metrics. Annotated correlation matrix for (A) whole data metrics and (B) diurnal and nocturnal metrics. The annotations represent the R2 coefficient of determination, which indicate the proportion of variance in one metric that is explained by the other metrics.


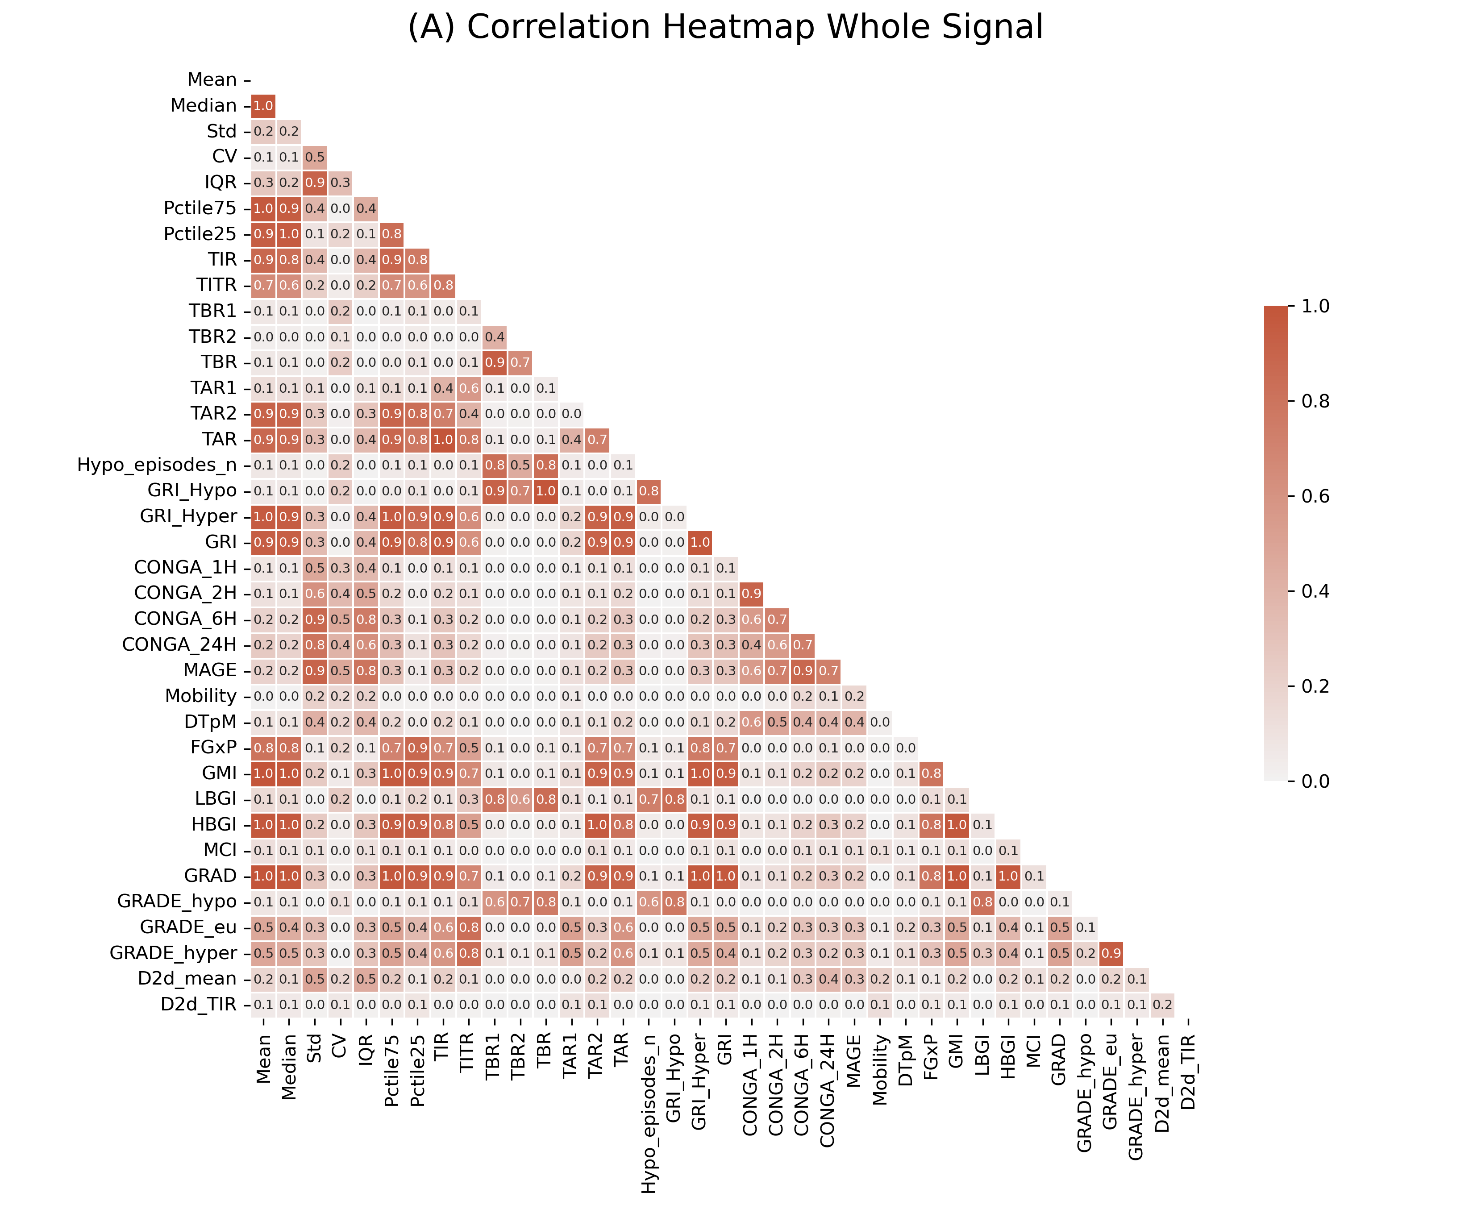


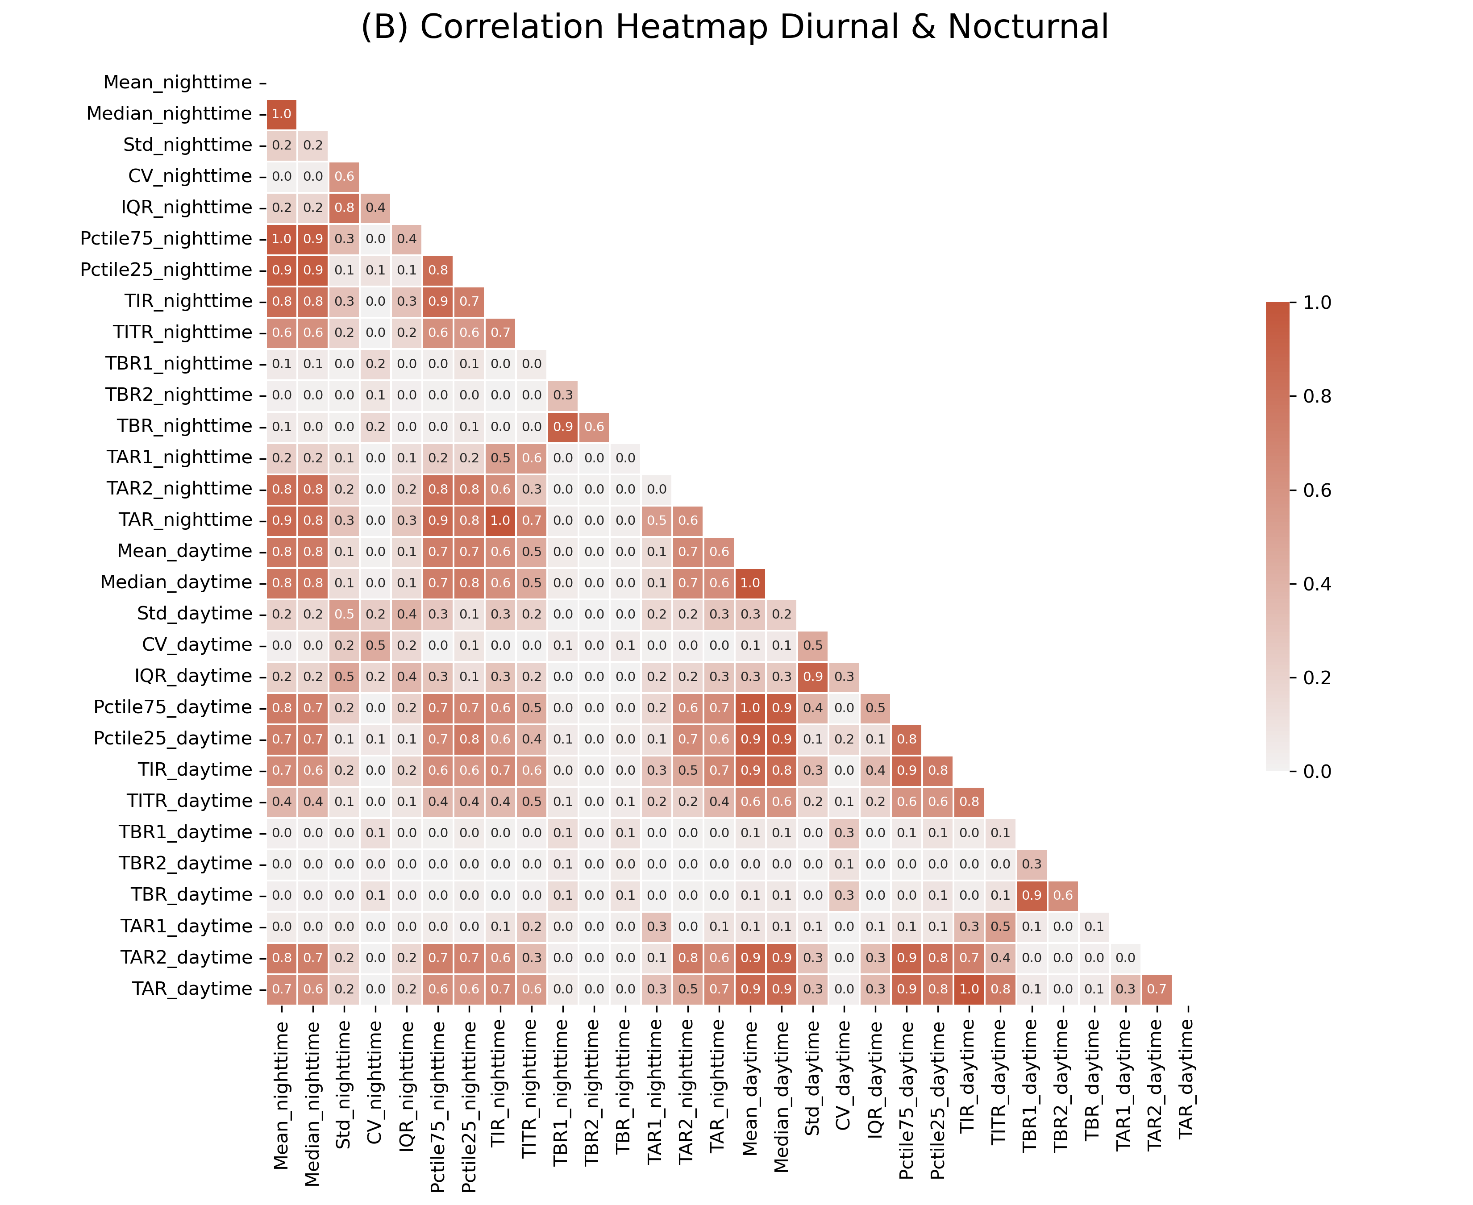

Supplement: Supplemental Information 4 [file peerj-13-19501-s004.docx]
